# Supplementary material
Source: ML conference proceedings conference paper supplement (https://www.ecva.net/papers/eccv_2024/papers_ECCV/html/7811_ECCV_2024_paper.php)
Supplement: Supplementary file 1 [file 07811-supp.pdf]

# ProSub: Probabilistic Open-Set Semi-Supervised Learning with Subspace-Based Out-of-Distribution Detection

Supplementary Material

## 6 Qualitative Analysis of Feature Separation

To further analyze the effects of the self-supervision,  $\ell_{\text{self}}$  from (10), and the subspace loss,  $\ell_{\text{sub}}$  from (8), we plot t-SNE (Maaten and Hinton, 2008) reductions of features from ID and OOD test sets for a few different training setups. These experiments are done with CIFAR-100 as ID and CIFAR-10 as OOD. First, we train a fully supervised model using all 50,000 training data (with labels) from CIFAR-100. This model is never exposed to OOD data. Secondly, we train ProSub using 10,000 labels and first train until the end of the warm-up phase. At this stage, the model has only been trained with the labeled cross-entropy,  $\ell_{\text{sup}}$  from (11), and self-supervision,  $\ell_{\text{self}}$ . Finally, we carry out a full training run of ProSub, where  $\ell_{\text{semi}}$  from (9) and  $\ell_{\text{sub}}$  are applied after the warm-up stage.

The results are shown in Fig. 5. From the top panel, we see that the fully supervised model successfully clusters the ID data in feature space. However, most OOD data are not clustered or separated from ID, highlighting the challenge of OOD detection when we do not receive learning signals from these data.

The next evaluated model is ProSub at the end of the warm-up. This model is trained with fewer labeled data than the fully supervised model but is exposed to both (unlabeled) ID and OOD through self-supervision. OOD data now begin to form distinct clusters, visibly separated from ID data. This suggests that self-supervision facilitates the clustering of both ID and OOD data. Visually, it seems reasonable to believe that OOD detection in this feature space is easier than for the fully supervised case. However, there are still regions where ID and OOD are mixed.

Finally, we have the features from the fully trained ProSub. Now we see even more clear and separated clusters for both ID and OOD data, indicating that the subspace loss further contributes to forming separated clusters for ID and OOD. An interesting observation is that OOD forms multiple clusters instead of one, even though this is not explicitly encouraged by either the self-supervision or the subspace loss. This indicates that the model not only learns to separate ID from OOD but also learns to group data within OOD.

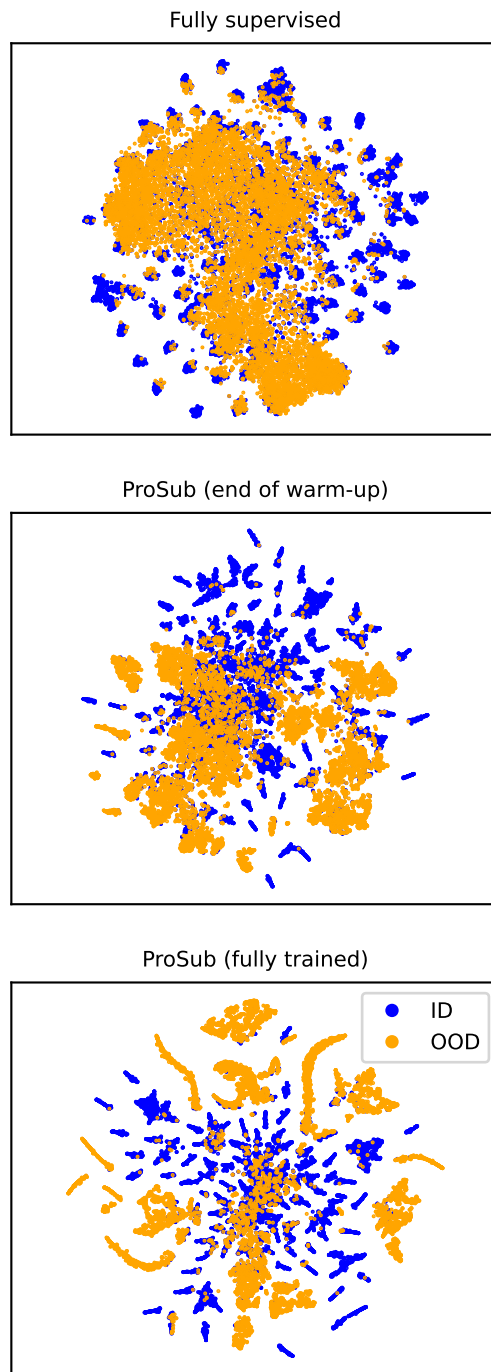

**Fig. 5:** t-SNE of features. ID: CIFAR-100, OOD: CIFAR-10.

**Table 5:** Evaluating OOD detection on unseen OOD using TIN.

|           | AUROC        |             |             |
|-----------|--------------|-------------|-------------|
|           | Accuracy     | Seen OOD    | Unseen OOD  |
| OpenMatch | 56.51        | 0.69        | 0.69        |
| SeFOSS    | 64.09        | 0.68        | <u>0.74</u> |
| ProSub    | <b>66.06</b> | <u>0.80</u> | 0.71        |

## 7 Experiments with Unseen Outliers

Tab. 1 evaluates AUROC of OOD detection on classes present in the unlabeled training set (seen OOD). While this is a core metric of OSSL performance, we also find value in exploring OOD detection for classes completely unseen during training (unseen OOD). To simulate this scenario, we divide Tiny ImageNet into three parts: 70 ID classes, 70 OOD classes present in the unlabeled training data, and 60 OOD classes entirely unseen during training. We use 3,500 labels. For this setting, we evaluate OpenMatch, SeFOSS, and ProSub. The results are shown in Tab. 5. We see that ProSub drops in AUROC when going from seen to unseen OOD, indicating that the losses applied to OOD data facilitate learning features to discriminate between ID and seen OOD specifically. In contrast, OpenMatch obtains consistent AUROC for both seen and unseen OOD and SeFOSS shows *better* AUROC for unseen OOD. However, despite this, ProSub demonstrates competitive results in OOD detection for unseen OOD.

## 8 Sensitivity Analysis of $\pi$

The probabilistic ID/OOD predictions of ProSub (see (1)) require specifying the proportion of ID data in unlabeled data,  $\pi$ . In the experiments conducted for this work, we use exact values of  $\pi$ , which is  $\pi = 0.5$  for all scenarios except ImageNet20/10 where it is  $\pi = 0.66$ . While it may be hard to know the exact value of  $\pi$  in practice, we argue that it is easy to get an approximation by inspecting a subset of unlabeled data. If this approximation is unavailable, one can treat  $\pi$  as a hyperparameter. To study how the performance of ProSub varies with  $\pi$ , we conduct experiments with CIFAR-100 as ID (10,000 labels) with CIFAR-10 as OOD using different values of  $\pi$ . With this setup,  $\pi = 0.5$  corresponds to the true proportion of ID data in unlabeled data.

Fig. 6 shows closed-set accuracy and AUROC as a function of  $\pi$ . We see that the obtained accuracy shows minimal dependency on  $\pi$ . The AUROC, interestingly, exhibits a stable high value as long as  $\pi$  does not exceed 0.5. This suggests avoiding misclassifying OOD as ID is more crucial than the reverse. One possible explanation is that the cross-entropy for labeled data (or from pseudo-labeling) acts as an “anchor” for ID data, counter-acting the subspace loss that pushes these data away from  $W_{\text{id}}$ . No such counterweight exists if OOD data are pushed towards  $W_{\text{id}}$ , making this type of error more detrimental.

To show that we do not make significant performance gains from knowing the exact value of  $\pi$ , we include results on some datasets where ProSub displays the best results in Tab. 1. In these experiments, we use  $\pi = 0.4$ , *i.e.*, lower than the true portion of ID data in the unlabeled data. These results are shown in Tab. 6, revealing that using an incorrect  $\pi$  does not significantly impact our results. For TIN, the accuracy is slightly lower when using  $\pi = 0.4$ , however, it is still higher than competing methods.

As a practical recommendation, we suggest using a  $\pi$  slightly lower than the approximation obtained from unlabeled data to avoid exceeding the true proportion.

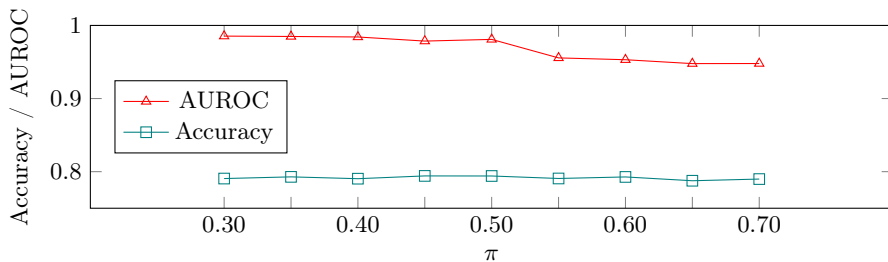

**Fig. 6:** Analyzing how ProSub performance depends on  $\pi$  ( $\pi = 0.5$  corresponding to the true value).

**Table 6:** Results from using an offset  $\pi$ :  $\pi = 0.4$ .

|                         | ID: CIFAR-100 (10,000 lab.)<br>OOD: CIFAR-10 | IN50/50                 | TIN100/100              |
|-------------------------|----------------------------------------------|-------------------------|-------------------------|
| ProSub (correct $\pi$ ) | 79.59±0.37<br>0.98±0.00                      | 71.15±0.80<br>0.96±0.00 | 60.92±0.32<br>0.72±0.00 |
| ProSub ( $\pi = 0.4$ )  | 79.54<br>0.98                                | 71.48<br>0.96           | 59.96<br>0.72           |

## 9 Hyperparameters

The values of most hyperparameters used in ProSub are gathered from existing works and used without further tuning. For example, we use  $w_{\text{semi}} = 1.0$  and initial learning rate  $\eta_0 = 0.03$ ,  $l^2$ -regularization  $w_{\text{reg}}$ , decay rate  $\gamma$ , EMA momentum, batch sizes, and SGD momentum following [51, 56]. For the evaluations done on TIN100/100 (new for this work), we copy the values for  $w_{\text{reg}}$  and  $\gamma$  used for CIFAR-100 in [56] ( $w_{\text{reg}} = 0.001$ ,  $\gamma = 5/8$ ) because of the equal number of

ID classes. For ImageNet50/50 (also new for this work) we copy the values for  $w_{\text{reg}}$  and  $\gamma$  used for ImageNet20/10 in [56] ( $w_{\text{reg}} = 0.0005$ ,  $\gamma = 7/8$ ).

The main hyperparameter introduced for ProSub is  $w_{\text{sub}}$ , the weight for the subspace loss. We empirically find that  $w_{\text{sub}} = 1.0$  works well across all evaluated datasets. Secondly, we use the cosine-based self-supervision from [55] that shows  $w_{\text{self}}$  can need dataset-specific tuning, which is why we use varying values of  $w_{\text{self}}$ .

### 9.1 Selecting Hyperparameters Using Validation Data

The hyperparameters we tune for ProSub are  $w_{\text{self}}$  and  $w_{\text{sub}}$ . Since labeled data are limited in OSSL, we suggest using a subset of labeled data as validation data to tune  $w_{\text{self}}$  and  $w_{\text{sub}}$ . Subsequently, these tuned values can be utilized in a training run using all available labeled data for training.

We illustrate this procedure using CIFAR-100 as ID (10,000 labels) with CIFAR-10 as OOD by using 5,000 labels for training and 5,000 for validation. Table 7 shows that  $w_{\text{sub}} = 1.0$  and  $w_{\text{self}} = 15.0$  yield the best validation accuracy among the evaluated values. Additionally, Tab. 7 shows that these values correspond to the best accuracy on the test set. Notably, the closed-set accuracies align reasonably well with the obtained AUROC, simplifying hyperparameter selection as AUROC cannot be evaluated directly from the validation set.

The gap in accuracy between the validation set and the test set arises from labeled data (and consequently validation data) being included in the unlabeled training set without labels. To obtain an absolute prediction of test accuracy (rather than a relative one), the validation data can be explicitly excluded from the unlabeled set.

**Table 7:** Tuning hyperparameters from validation data.

| Validation results |       |              |       | Test results      |       |              |       |
|--------------------|-------|--------------|-------|-------------------|-------|--------------|-------|
| $w_{\text{self}}$  |       |              |       | $w_{\text{self}}$ |       |              |       |
| $w_{\text{sub}}$   | 5.0   | 15.0         | 25.0  | $w_{\text{sub}}$  | 5.0   | 15.0         | 25.0  |
| 0.1                | 86.82 | 87.58        | 88.12 | 0.1               | 72.67 | 75.72        | 75.08 |
| 1.0                | 86.66 | <b>88.56</b> | 88.36 | 1.0               | 72.76 | <b>77.25</b> | 77.15 |
| 10.0               | 52.00 | 79.44        | 85.84 | 10.0              | 12.25 | 58.78        | 71.43 |
|                    |       |              |       |                   | 0.58  | 0.67         | 0.86  |

### 9.2 The Number of Training Steps

We set the number of training steps,  $K$ , to obtain reasonable training times, which is why we use a lower number of training steps for the ImageNet experiments. We have not observed any issues with overfitting or training collapse.

The best performance is generally achieved at the end of training as shown in Fig. 7. This figure shows test accuracy and AUROC as a function of training steps for a run on ImageNet50/50. This likely means that increasing the number of training steps should obtain equal or better results.

We have set the number of warm-up steps,  $K_p$ , to be a small but non-trivial fraction of the total number of training steps. Table 8 shows results on ImageNet50/50 with varying  $K_p$  and a fixed  $K = 10^5$ , showing that the results are insensitive to the choice of  $K_p$ .

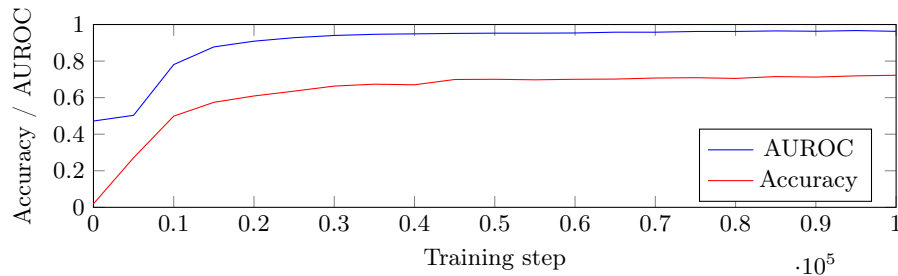

**Fig. 7:** ImageNet50/50 performance vs. training steps.

**Table 8:** Varying  $K_p$  on ImageNet50/50 (with  $K = 10^5$ ).

| $K_p/10^3$ | 15    | 20    | 25    | 30    | 35    | 40    |
|------------|-------|-------|-------|-------|-------|-------|
| Acc        | 71.92 | 72.52 | 71.44 | 71.15 | 71.40 | 71.60 |
| AUROC      | 0.96  | 0.96  | 0.96  | 0.96  | 0.96  | 0.96  |

### 9.3 Fine-grained Hyperparameter Sensitivity

To further analyze the sensitivity of hyperparameters  $w_{\text{sub}}$  and  $w_{\text{self}}$  we run experiments on ImageNet50/50 with varying  $w_{\text{sub}}$  and  $w_{\text{self}}$ . Figure 8 shows that the results drop when we go far away from the values used to generate the main results in Tab. 1, but there are relatively large ranges for both  $w_{\text{sub}}$  and  $w_{\text{self}}$  where the results are stable.

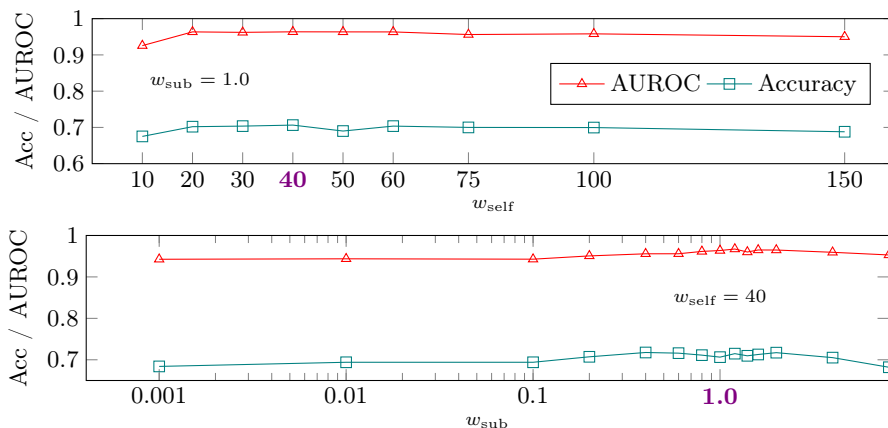

**Fig. 8:** Hyperparameter evaluations on ImageNet50/50 test sets. **Violet** marks values used for Tab. 1.

#### 9.4 Initiation of Beta Parameters

For the IMM estimation, we use the initial guess  $\alpha_{id} = \beta_{ood} = 10$ ,  $\alpha_{ood} = \beta_{id} = 2$ . We make this choice to ensure that the estimate for the ID distribution lies closer to 1.0 than the OOD distribution. However, because of the warm-up phase, the estimates have time to improve and settle before they are used to generate training signal through  $\ell_{semi}$  (9) and  $\ell_{sub}$  (8). We have not found the initiation of these parameters to be significant for our performance.

## 10 Varying ID/OOD Ratios in Unlabeled Data

In the experiments of Tab. 1, most of our benchmark problems have equal amounts of ID and OOD in the unlabeled set. Here, we study how ProSub performs with varying ratios of ID to OOD data in the unlabeled set. Figure 9 shows closed-set accuracy and AUROC for ProSub with varying OOD frequencies. We let  $\pi$  follow the true ID/OOD ratio. For these experiments, we use CIFAR-100 (2,500 labels) as ID with CIFAR-10 as OOD, and ImageNet50/50. As expected, AUROC increases with more OOD data because the exposure to OOD data through self-supervision enables better OOD detection (see Sec. 4.3). Conversely, closed-set accuracy drops as ID data decreases due to fewer pseudo-labels that help us learn the ID classes. The results indicate optimal OOD frequencies around 0.4 - 0.5 that yield the best results for both OOD detection and closed-set accuracy. However, the OOD frequency is difficult to control in real-world scenarios.

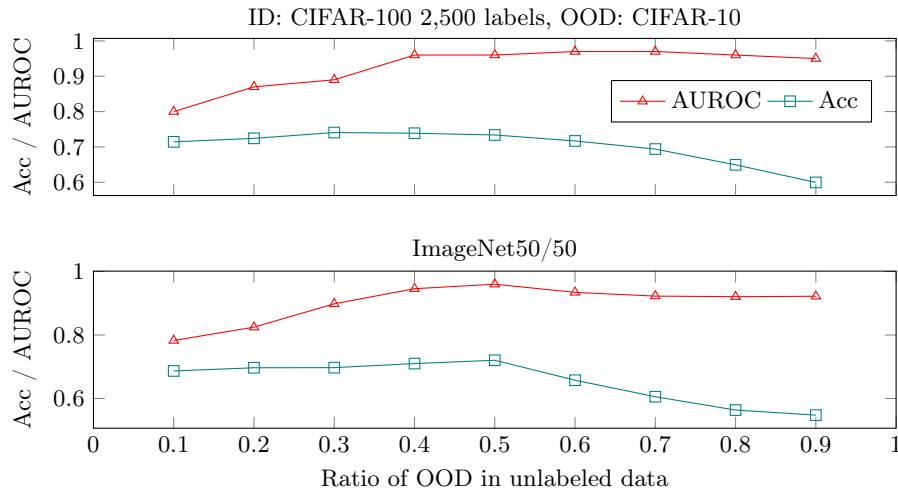

Fig. 9: ProSub performance with varying ratios of ID and OOD in the unlabeled set.

## 11 Regularization of ID Probabilities

Based on the observation in Sec. 8 that avoiding misclassifying ID as OOD is more important than the reverse, we find it beneficial to regularize the ID probabilities when computing the random mask in (7). This is achieved by adding a constant,  $\epsilon$ , to the denominator of (1) as

$$p(\mathbf{x} \in \mathcal{ID} | s(\mathbf{z})) = \frac{\pi p_{\text{id}}(s(\mathbf{z}))}{\pi p_{\text{id}}(s(\mathbf{z})) + (1 - \pi) p_{\text{ood}}(s(\mathbf{z})) + \epsilon}. \quad (14)$$

We have found  $\epsilon = 0.1$  to be a suitable value. Note that this regularization is used only for computing the random mask and not in the IMM estimation.

## 12 Limitations

Section 7 shows ProSub’s superior performance on OOD detection for *seen* OOD specifically. While ProSub remains competitive for unseen OOD detection, other methods may perform better if unseen OOD detection is your most important metric. Furthermore, this work only considers datasets that are balanced in terms of classes. We do not know how big shifts in class balances impact our performance. Finally, a limitation of ProSub lies in its dependence on dataset-specific tuning of  $w_{\text{self}}$  and the necessity to tune  $\pi$  or approximate the proportion of ID data within the unlabeled data.

## 13 Score Distributions and Estimates

In Sec. 4.2 and Fig. 3 we look at the distributions of scores and the corresponding estimates at two different time steps during training. Here, in Fig. 10, we show



the equivalent evaluations at more time steps during training to display how the distributions and their corresponding estimates progress. These results are from a run using CIFAR-100 (2,500 labels) as ID with CIFAR-10 as OOD. The current training step is denoted by  $k$  and the warm-up phase runs for 50,000 steps.

Figure 10 shows that during the warm-up phase, most data stay fairly close to  $W_{\text{id}}$ , but as training progresses, we start to distinguish between ID and OOD when the distribution of OOD moves slowly away from  $W_{\text{id}}$ . Interestingly, despite the overlapping distributions, the estimated Beta distributions accurately capture the individual mixture components throughout the warm-up phase.

After the warm-up phase (indicated by the horizontal black dashed line in Fig. 10), when we apply  $\ell_{\text{sub}}$  from (8), we see that the distribution of scores for OOD data quickly moves away from  $W_{\text{id}}$  (lower scores). The distribution of scores for ID data similarly moves closer to  $W_{\text{id}}$  (higher scores). The estimated Beta distributions adapt well to this sudden change.

However, we also see that a few OOD data incorrectly get scores close to 1.0, highlighting that our obtained ID/OOD classifier does not have perfect accuracy. Notably, the set of OOD data that obtain high scores after the warm-up phase seems to grow and shrink in size at different time steps, indicating that the model can recover from misclassifying these data.

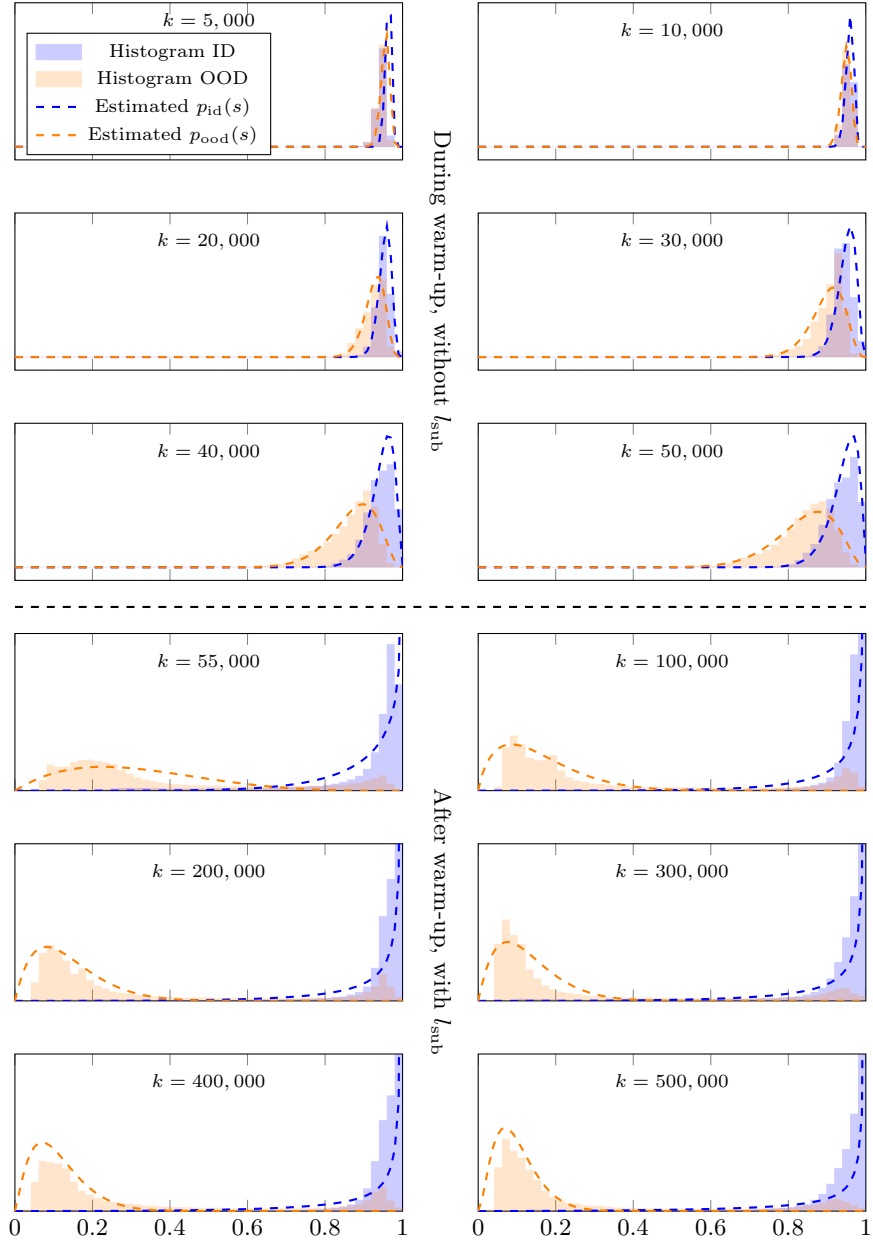

**Fig. 10:** Distributions of scores and their corresponding estimates at different time steps during training.

## 14 Indexing of Classes in TIN and IN100

For completeness, we specify how we divide the classes of Tiny ImageNet and ImageNet100 into ID and OOD. How classes are indexed in ImageNet100 are shown in Tab. 9. Here, we use indices 0-49 as ID and 50-99 classes as OOD.

The indexing of classes in Tiny ImageNet is shown in Tab. 10. For experiments on TIN100/100, we use indices 0-99 as ID and 100-199 as OOD. For the experiments conducted using unseen OOD in Sec. 7, we use 0-69 ID, 70-139 as seen OOD, and 140-199 as unseen OOD.

**Table 9:** Class indexing for ImageNet100.

| Class     | Index | Class     | Index |
|-----------|-------|-----------|-------|
| n01440764 | 0     | n01773797 | 50    |
| n01443537 | 1     | n01774384 | 51    |
| n01484850 | 2     | n01774750 | 52    |
| n01491361 | 3     | n01775062 | 53    |
| n01494475 | 4     | n01776313 | 54    |
| n01496331 | 5     | n01795545 | 55    |
| n01498041 | 6     | n01796340 | 56    |
| n01514668 | 7     | n01798484 | 57    |
| n01514859 | 8     | n01806143 | 58    |
| n01531178 | 9     | n01818515 | 59    |
| n01537544 | 10    | n01819313 | 60    |
| n01560419 | 11    | n01820546 | 61    |
| n01582220 | 12    | n01824575 | 62    |
| n01592084 | 13    | n01828970 | 63    |
| n01601694 | 14    | n01829413 | 64    |
| n01608432 | 15    | n01833805 | 65    |
| n01614925 | 16    | n01843383 | 66    |
| n01622779 | 17    | n01847000 | 67    |
| n01630670 | 18    | n01855672 | 68    |
| n01632458 | 19    | n01860187 | 69    |
| n01632777 | 20    | n01877812 | 70    |
| n01644900 | 21    | n01883070 | 71    |
| n01664065 | 22    | n01910747 | 72    |
| n01665541 | 23    | n01914609 | 73    |
| n01667114 | 24    | n01924916 | 74    |
| n01667778 | 25    | n01930112 | 75    |
| n01675722 | 26    | n01943899 | 76    |
| n01677366 | 27    | n01944390 | 77    |
| n01685808 | 28    | n01950731 | 78    |
| n01687978 | 29    | n01955084 | 79    |
| n01693334 | 30    | n01968897 | 80    |
| n01695060 | 31    | n01978287 | 81    |
| n01698640 | 32    | n01978455 | 82    |
| n01728572 | 33    | n01984695 | 83    |
| n01729322 | 34    | n01985128 | 84    |
| n01729977 | 35    | n01986214 | 85    |
| n01734418 | 36    | n02002556 | 86    |
| n01735189 | 37    | n02006656 | 87    |
| n01739381 | 38    | n02007558 | 88    |
| n01740131 | 39    | n02011460 | 89    |
| n01742172 | 40    | n02012849 | 90    |
| n01749939 | 41    | n02013706 | 91    |
| n01751748 | 42    | n02018207 | 92    |
| n01753488 | 43    | n02018795 | 93    |
| n01755581 | 44    | n02027492 | 94    |
| n01756291 | 45    | n02028035 | 95    |
| n01770081 | 46    | n02037110 | 96    |
| n01770393 | 47    | n02051845 | 97    |
| n01773157 | 48    | n02058221 | 98    |
| n01773549 | 49    | n02077923 | 99    |

**Table 10:** Class indexing for Tiny ImageNet.

| Class     | Index | Class     | Index | Class     | Index | Class     | Index |
|-----------|-------|-----------|-------|-----------|-------|-----------|-------|
| n02814533 | 0     | n03100240 | 50    | n07615774 | 100   | n01768244 | 150   |
| n02113799 | 1     | n04149813 | 51    | n03355925 | 101   | n03617480 | 151   |
| n02883205 | 2     | n01917289 | 52    | n04371430 | 102   | n04487081 | 152   |
| n04597913 | 3     | n04507155 | 53    | n01945685 | 103   | n07768694 | 153   |
| n03733131 | 4     | n02892201 | 54    | n03649909 | 104   | n02002724 | 154   |
| n04179913 | 5     | n03089624 | 55    | n03404251 | 105   | n06596364 | 155   |
| n02802426 | 6     | n02132136 | 56    | n03891332 | 106   | n03042490 | 156   |
| n04070727 | 7     | n04254777 | 57    | n07695742 | 107   | n04285008 | 157   |
| n03706229 | 8     | n02927161 | 58    | n04311004 | 108   | n03544143 | 158   |
| n02321529 | 9     | n03983396 | 59    | n02823428 | 109   | n03980874 | 159   |
| n02085620 | 10    | n02123045 | 60    | n07749582 | 110   | n02279972 | 160   |
| n03970156 | 11    | n02791270 | 61    | n04399382 | 111   | n03770439 | 161   |
| n02730930 | 12    | n09246464 | 62    | n07875152 | 112   | n04560804 | 162   |
| n02268443 | 13    | n03447447 | 63    | n09193705 | 113   | n07711569 | 163   |
| n02099712 | 14    | n04417672 | 64    | n02074367 | 114   | n04356056 | 164   |
| n04133789 | 15    | n07579787 | 65    | n03937543 | 115   | n02977058 | 165   |
| n04251144 | 16    | n07583066 | 66    | n02206856 | 116   | n03854065 | 166   |
| n03026506 | 17    | n02795169 | 67    | n01698640 | 117   | n03179701 | 167   |
| n04532106 | 18    | n03393912 | 68    | n02788148 | 118   | n02486410 | 168   |
| n07614500 | 19    | n04023962 | 69    | n02917067 | 119   | n02058221 | 169   |
| n07747607 | 20    | n04486054 | 70    | n01983481 | 120   | n09428293 | 170   |
| n01742172 | 21    | n02233338 | 71    | n02504458 | 121   | n04265275 | 171   |
| n03160309 | 22    | n01855672 | 72    | n02281406 | 122   | n01443537 | 172   |
| n03992509 | 23    | n02814860 | 73    | n04376876 | 123   | n03814639 | 173   |
| n01784675 | 24    | n04067472 | 74    | n02056570 | 124   | n02165456 | 174   |
| n01644900 | 25    | n02410509 | 75    | n03388043 | 125   | n02129165 | 175   |
| n02808440 | 26    | n02480495 | 76    | n02423022 | 126   | n02509815 | 176   |
| n01774750 | 27    | n03126707 | 77    | n07720875 | 127   | n02190166 | 177   |
| n02669723 | 28    | n07753592 | 78    | n02125311 | 128   | n02124075 | 178   |
| n03838899 | 29    | n03085013 | 79    | n03400231 | 129   | n07920052 | 179   |
| n01910747 | 30    | n02988304 | 80    | n02226429 | 130   | n03804744 | 180   |
| n03444034 | 31    | n02099601 | 81    | n04465501 | 131   | n01770393 | 181   |
| n04118538 | 32    | n04501370 | 82    | n02841315 | 132   | n04562935 | 182   |
| n03662601 | 33    | n02909870 | 83    | n02843684 | 133   | n03976657 | 183   |
| n02948072 | 34    | n03014705 | 84    | n09332890 | 134   | n04328186 | 184   |
| n02231487 | 35    | n04146614 | 85    | n02415577 | 135   | n03599486 | 185   |
| n02106662 | 36    | n02666196 | 86    | n04596742 | 136   | n02999410 | 186   |
| n02094433 | 37    | n04074963 | 87    | n04275548 | 137   | n03637318 | 187   |
| n07873807 | 38    | n01882714 | 88    | n01774384 | 138   | n03584254 | 188   |
| n01641577 | 39    | n03930313 | 89    | n02793495 | 139   | n02769748 | 189   |
| n03977966 | 40    | n07734744 | 90    | n02395406 | 140   | n02123394 | 190   |
| n04259630 | 41    | n04366367 | 91    | n07715103 | 141   | n04540053 | 191   |
| n07871810 | 42    | n03837869 | 92    | n03255030 | 142   | n03763968 | 192   |
| n02906734 | 43    | n03250847 | 93    | n02403003 | 143   | n03902125 | 193   |
| n02364673 | 44    | n02236044 | 94    | n04456115 | 144   | n03670208 | 194   |
| n04008634 | 45    | n03201208 | 95    | n04398044 | 145   | n03796401 | 195   |
| n09256479 | 46    | n02437312 | 96    | n12267677 | 146   | n01629819 | 196   |
| n02815834 | 47    | n02837789 | 97    | n03424325 | 147   | n02950826 | 197   |
| n02481823 | 48    | n02699494 | 98    | n01950731 | 148   | n04532670 | 198   |
| n02963159 | 49    | n04099969 | 99    | n01984695 | 149   | n01944390 | 199   |
